# Supplementary material for: Intense pulsed light induced crystallization of a liquid-crystalline polymer semiconductor for efficient production of flexible thin-film transistors
Source: Royal Society of Chemistry journal article supplement (doi:10.1039/c5cp06989k), 2016-01-01
Supplement: c5cp06989k1.pdf [file c5cp06989k1.pdf]

## Supporting Information

### Intense Pulse Light Induced Crystallization of Liquid-Crystalline Polymer Semiconductor for Efficient Production of Flexible Thin-Film Transistors

Hee Yeon Yang,<sup>a, c</sup> Han-Wool Park,<sup>b</sup> Soo Jin Kim,<sup>d</sup> Jae-Min Hong,<sup>a</sup> Tae Whan Kim,<sup>c</sup> Do Hwan Kim,<sup>b</sup> and Jung Ah Lim<sup>d,\*</sup>

<sup>a</sup> Photo-electronic Hybrids Research Center, Korea Institute of Science and Technology, 02792 Seoul, Korea

<sup>b</sup> Department of Organic Materials and Fiber Engineering, Soongsil University, 06978 Seoul, Korea

<sup>c</sup> Department of Electronics and Computer Engineering, Hanyang University, 04763 Seoul, Korea

<sup>d</sup> Center for Opto-Electronic Materials and Devices, Korea Institute of Science and Technology, 02792 Seoul, Korea

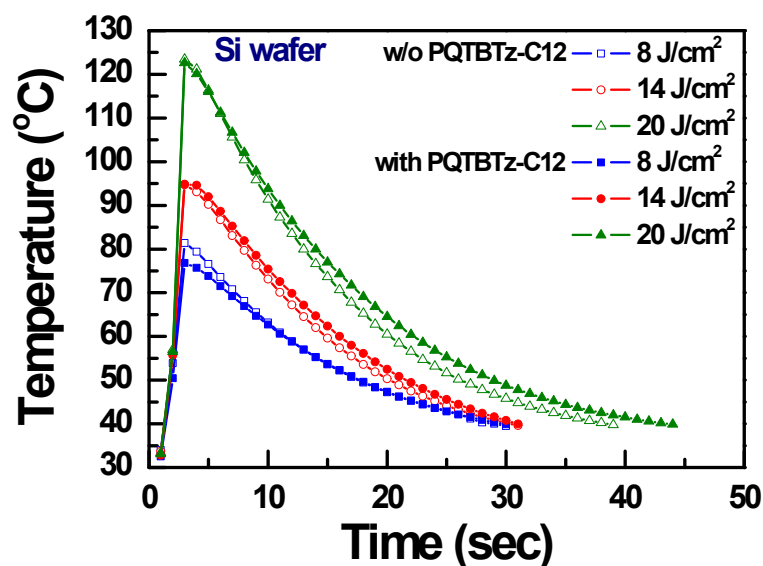

**Figure S1.** Surface temperature of the samples prepared on Si wafer during the IPWL treatment.

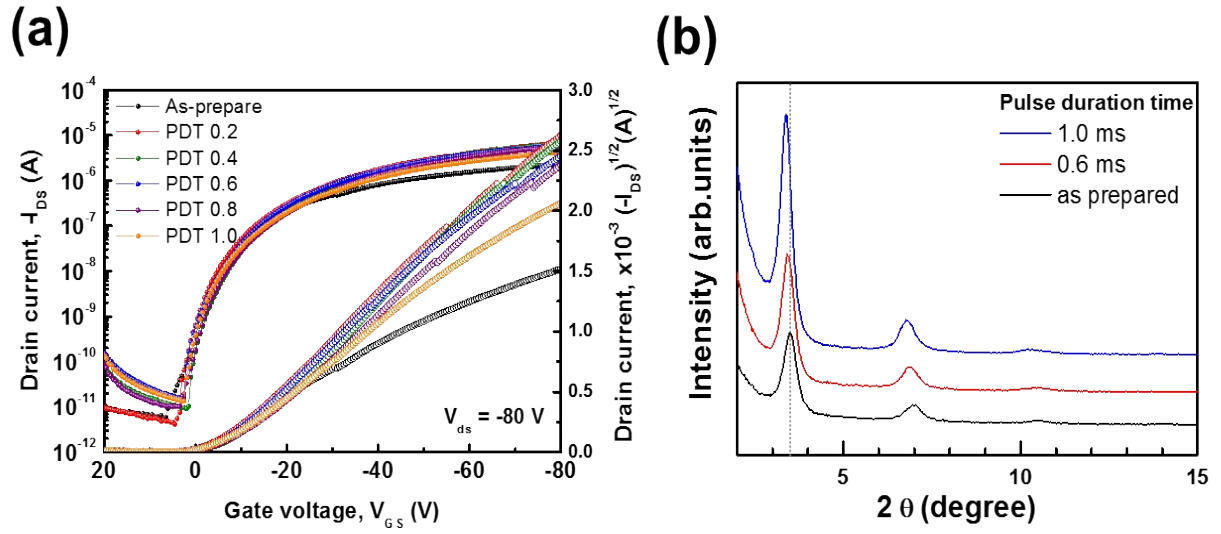

**Figure S2.** (a) Transfer characteristics of the device based on the PQTBTz-C12 thin film treated by IPWL with various pulse duration time (PDT). (b) Out-of-plane mode grazing incidence XRD spectra of PQTBTz-C12 thin film treated by IPWL with various pulse duration time (PDT).

**Table S1.** Summary of the electrical parameters for the devices based on PQTBTz-C12 thin film treated by IPWL with various pulse duration time (PDT).

| Condition                               |             | FE. Mobility @V <sub>DS</sub> =-80 V<br>[x10 <sup>-3</sup> cm <sup>2</sup> /Vs] | I <sub>on</sub> /I <sub>off</sub> ratio |
|-----------------------------------------|-------------|---------------------------------------------------------------------------------|-----------------------------------------|
|                                         | As-prepared | 6.90                                                                            | 10 <sup>5</sup>                         |
|                                         | 0.2 ms      | 22.8                                                                            | 10 <sup>6</sup>                         |
| IPWL<br>Pulse<br>duration<br>time (PDT) | 0.4 ms      | 14.4                                                                            | 10 <sup>5</sup>                         |
|                                         | 0.6 ms      | 13.9                                                                            | 10 <sup>5</sup>                         |
|                                         | 0.8 ms      | 11.8                                                                            | 10 <sup>5</sup>                         |
|                                         | 1.0 ms      | 8.83                                                                            | 10 <sup>5</sup>                         |

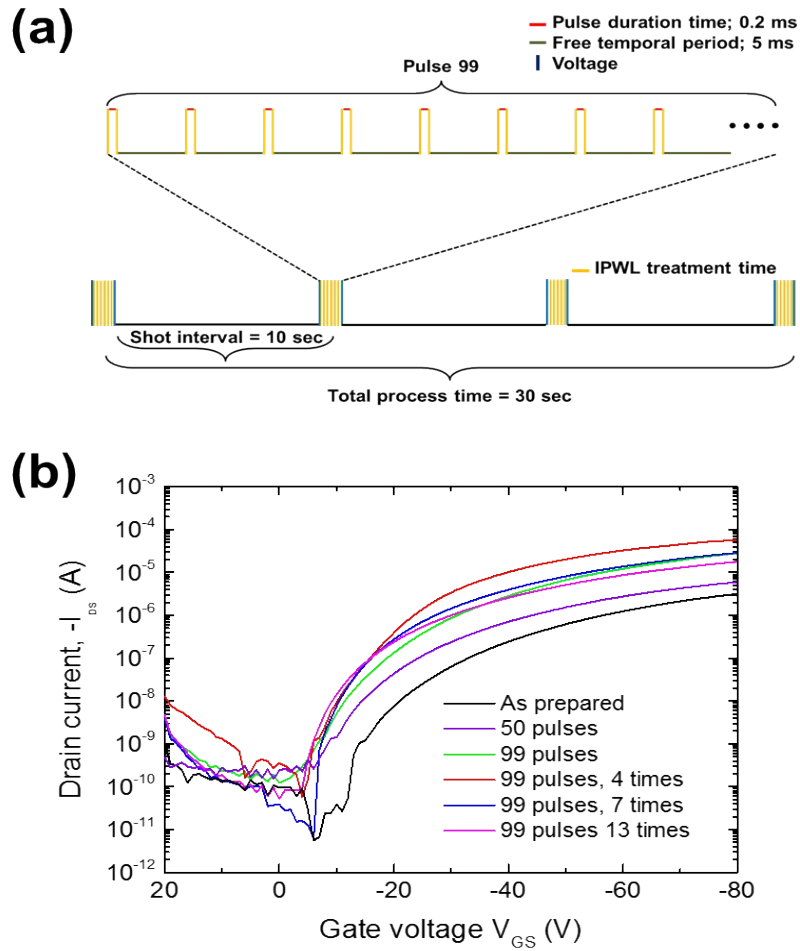

**Figure S3.** (a) Schematic for the pulse conditions of repeated IPWL irradiation. (b) Transfer characteristics of the device based on the PQTBTz-C12 thin film with difference number of pulses and repeated IPWL irradiations.

**Table S1.** Summary of the electrical parameters for the devices based on PQTBTz-C12 thin film treated by IPWL with various number of pulses and repeated irradiation times.

| Condition                                                        |            | FE. Mobility @ $V_{DS}=-80$ V<br>[ $\times 10^{-3}$ cm <sup>2</sup> /Vs] | $I_{on}/I_{off}$ ratio |
|------------------------------------------------------------------|------------|--------------------------------------------------------------------------|------------------------|
| As-prepared                                                      |            | 24.9                                                                     | $10^4$                 |
| 50 pulses                                                        |            | 43.4                                                                     | $10^4$                 |
| 99 pulses                                                        |            | 48.8                                                                     | $10^4$                 |
| Repeat times of<br>99 pulses irradiation<br>(Total process time) | 4 (30 s)   | 63.2                                                                     | $10^5$                 |
|                                                                  | 7 (60 s)   | 35.6                                                                     | $10^5$                 |
|                                                                  | 13 (120 s) | 20.6                                                                     | $10^5$                 |

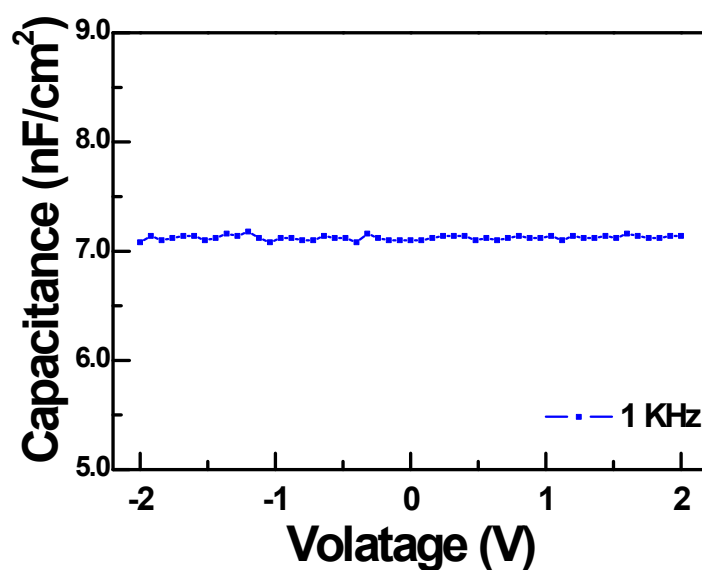

**Figure S4.** The plot of capacitance as a function of the applied voltage for the cross-linked PVP films. Measurement was carried out at 1 kHz.

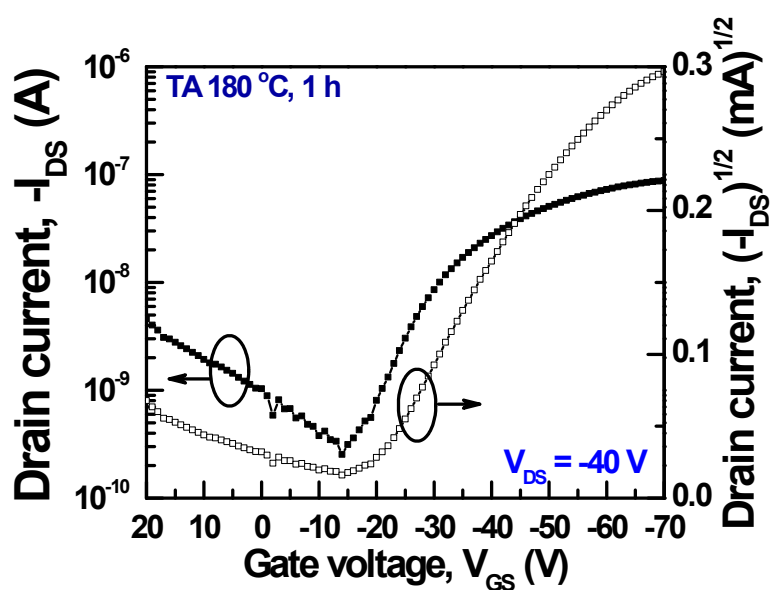

| Condition    | FE Mobility<br>[cm <sup>2</sup> /Vs] | $I_{on}/I_{off}$ ratio | Threshold Voltage<br>[V] |
|--------------|--------------------------------------|------------------------|--------------------------|
| 180 °C, 1 hr | $8.71 \times 10^{-4}$                | $\sim 10^2$            | -18                      |

**Figure S5.** Transfer characteristic of a flexible PQTBTz-C12 transistor treated with TA at 180 °C for 1 hr.

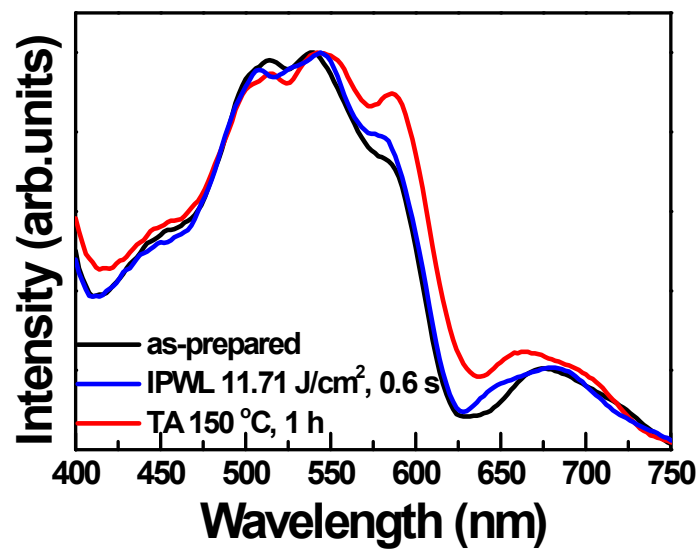

**Figure S6.** UV-vis absorption of as-prepared, IPWL and TA treated PQTBTz-C12 films deposited on PES substrate.
